# Supplementary material for: MR Imaging Biomarkers for Clinical Impairment and Disease Progression in Patients with Shoulder Adhesive Capsulitis: A Prospective Study
Source: J Clin Med. 2021 Aug 29;10(17):3882. doi: 10.3390/jcm10173882 (PMC8432015; doi:10.3390/jcm10173882)
Supplement: Supplementary file 1 [file jcm-10-03882-s001.zip › jcm-1348160-supplementary.pdf]

# Supplementary Materials:

Table S1: Modified Constant-Murley Score

| Parameters                 | Degree                             | Points |
|----------------------------|------------------------------------|--------|
| Pain                       | None                               | 15     |
|                            | Mild                               | 10     |
|                            | Moderate                           | 5      |
|                            | Severe                             | 0      |
| Activities of daily living | Full work                          | 4      |
|                            | Full recreation/sport              | 4      |
|                            | Unaffected sleep                   | 2      |
| Arm positionning           | Up to the waist                    | 4      |
|                            | Up to the xiphoid                  | 2      |
|                            | Up to the neck                     | 6      |
|                            | Up to the top of the head          | 8      |
| Forward elevation          | Above the head                     | 10     |
|                            | 0–30°                              | 0      |
|                            | 31–60°                             | 2      |
|                            | 61–90°                             | 4      |
|                            | 90–120°                            | 6      |
|                            | 121–150°                           | 8      |
|                            | 151–180°                           | 10     |
| Abduction                  | 0–30°                              | 0      |
|                            | 31–60°                             | 2      |
|                            | 61–90°                             | 4      |
|                            | 90–120°                            | 6      |
|                            | 121–150°                           | 8      |
|                            | 151–180°                           | 10     |
| Combined external rotation | Hand behind head, elbow forward    | 2      |
|                            | Hand behind head, elbow back       | 2      |
|                            | Hand on top of head, elbow forward | 2      |
|                            | Hand on top of head, elbow back    | 2      |
|                            | Full elevation from top of head    | 2      |
| Combined internal rotation | Interscapular region               | 10     |
|                            | Inferior tip of scapula            | 8      |
|                            | Twelfth rib                        | 6      |
|                            | Lumbosacral junction               | 4      |
|                            | Buttock                            | 2      |
|                            | Lateral Thigh                      | 0      |
|                            | Score                              | x/75   |
| Diurnal Pain               | Yes/No                             |        |
| Night Pain                 | Yes/No                             |        |
| Predominance of Night Pain | Yes/No                             |        |
| Pain duration              | No pain                            | 0      |
|                            | Less than 6 weeks                  | 1      |
|                            | Between 6 weeks and 3 months       | 2      |
|                            | Between 3 and 6 months             | 3      |
|                            | Between 6 months and 1 year        | 4      |
|                            | Over 1 year                        | 5      |
